# Supplementary material
Source: PubMed Central journal article supplement (PMC4860775)

# Figure S1

HEK HeLa SW480 MCF-7 A375 A549

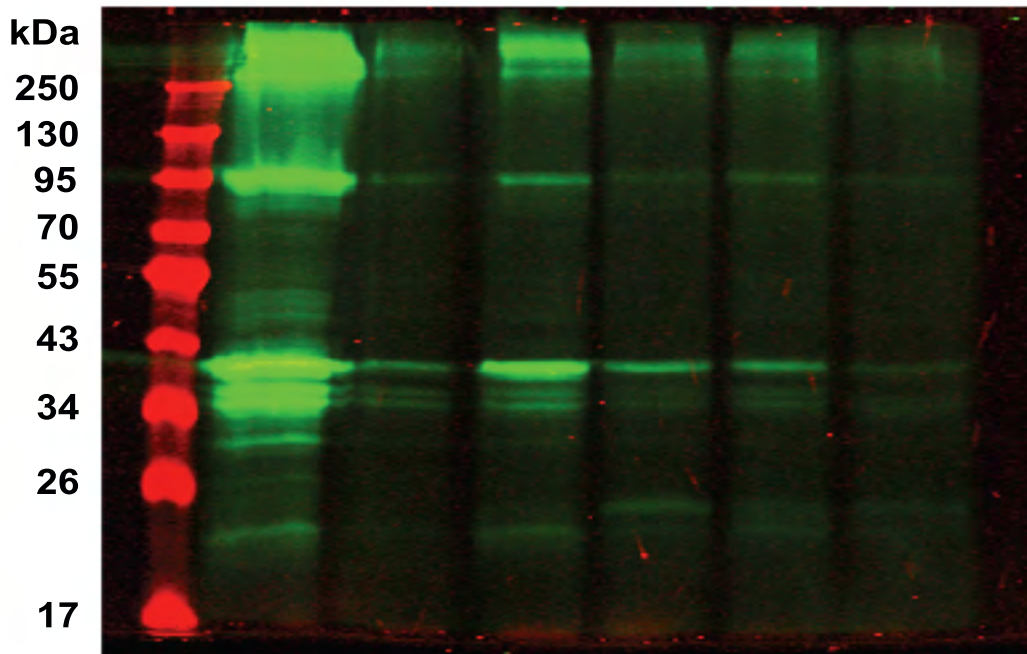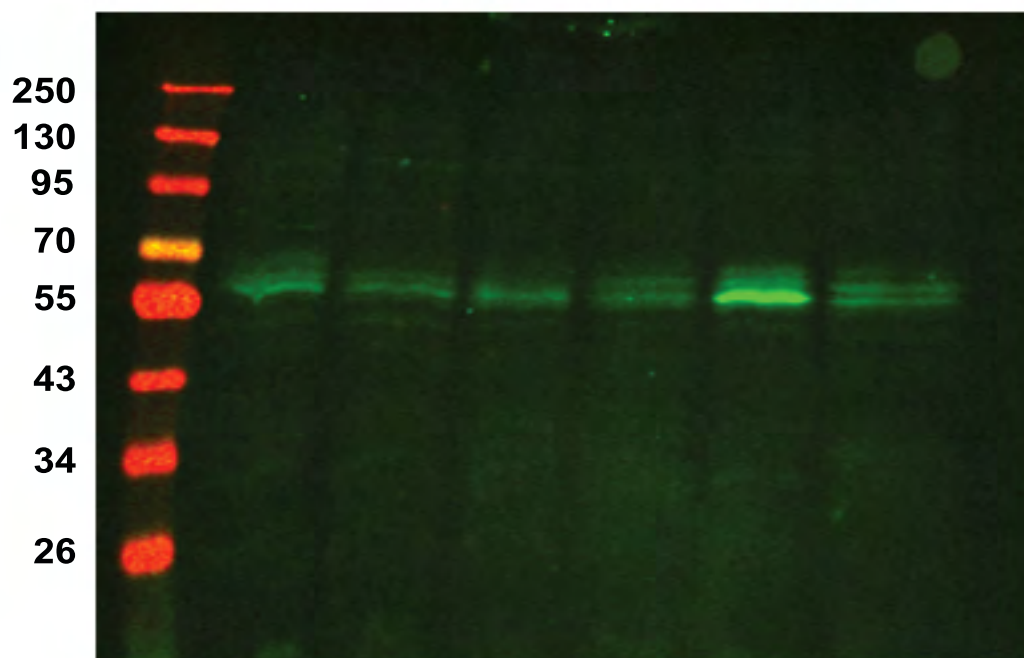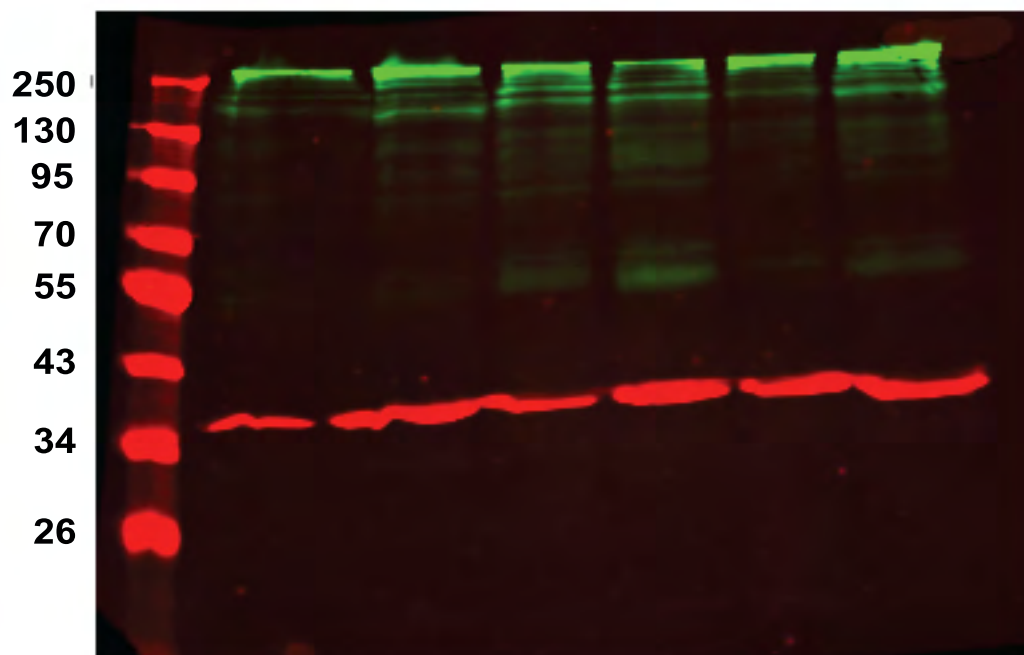

Supplement: celldisc201511-s1.pdf [file celldisc201511-s1.pdf]
