# Supplementary material
Source: PubMed Central journal article supplement (PMC4860775)

**Figure S2**

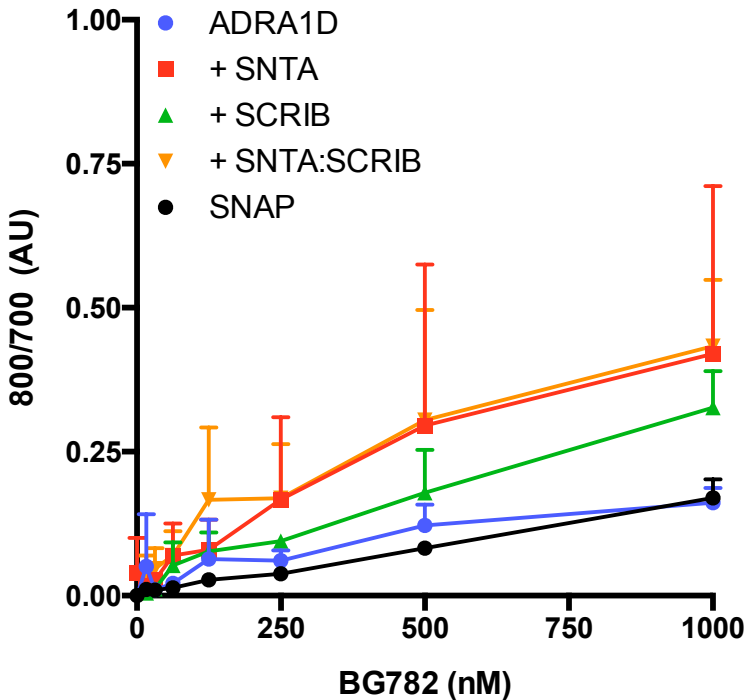

Supplement: celldisc201511-s2.pdf [file celldisc201511-s2.pdf]
