# Supplementary material
Source: PubMed Central journal article supplement (PMC4860775)

Figure S3

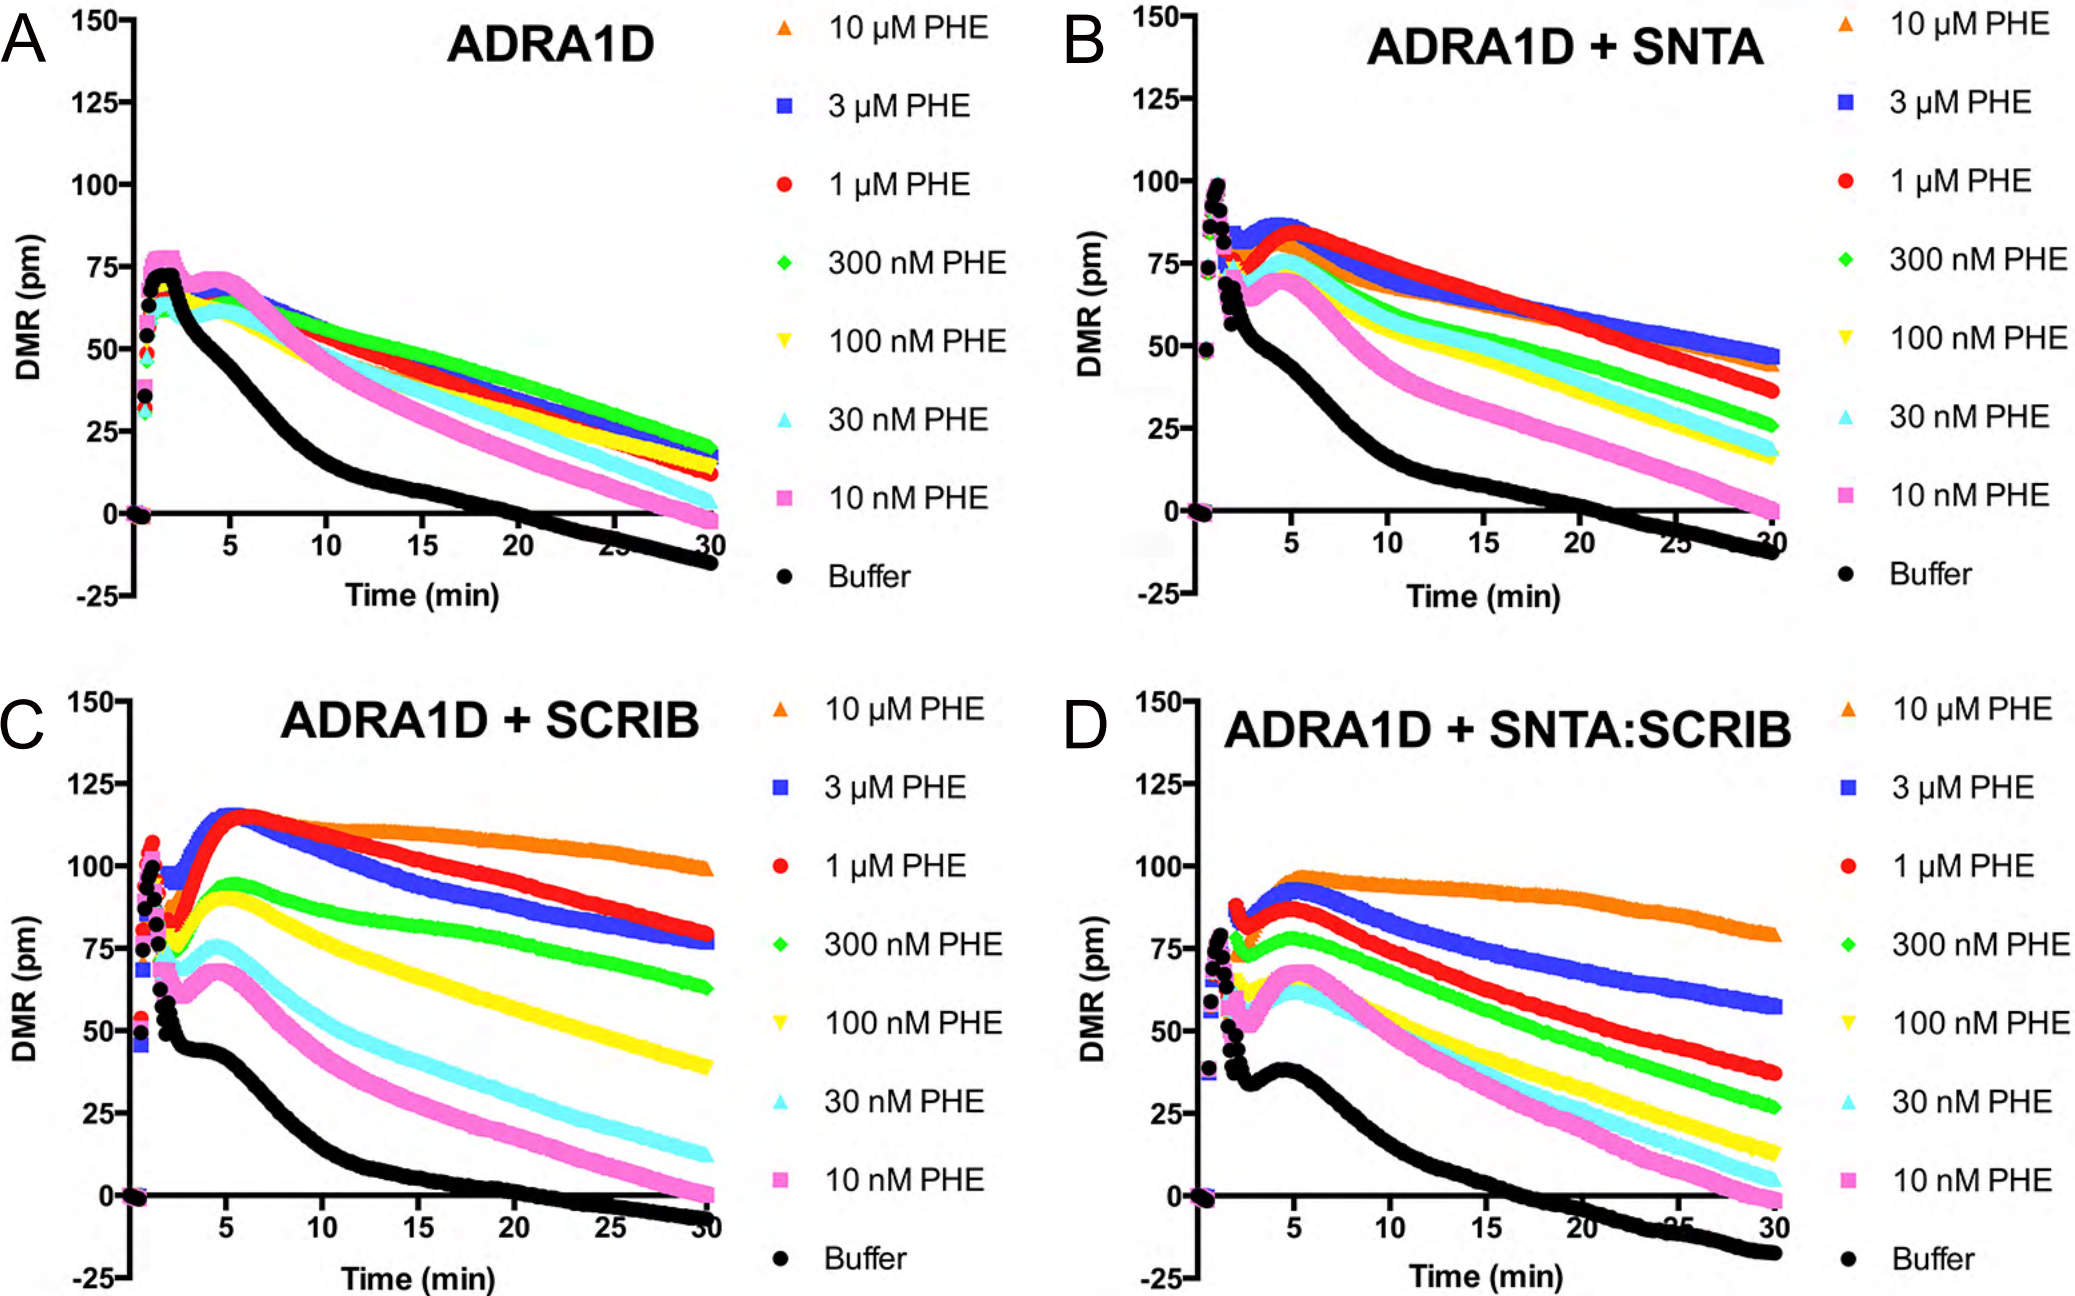

Supplement: celldisc201511-s3.pdf [file celldisc201511-s3.pdf]
