# Supplementary material
Source: PubMed Central journal article supplement (PMC4860775)

**Figure S4**

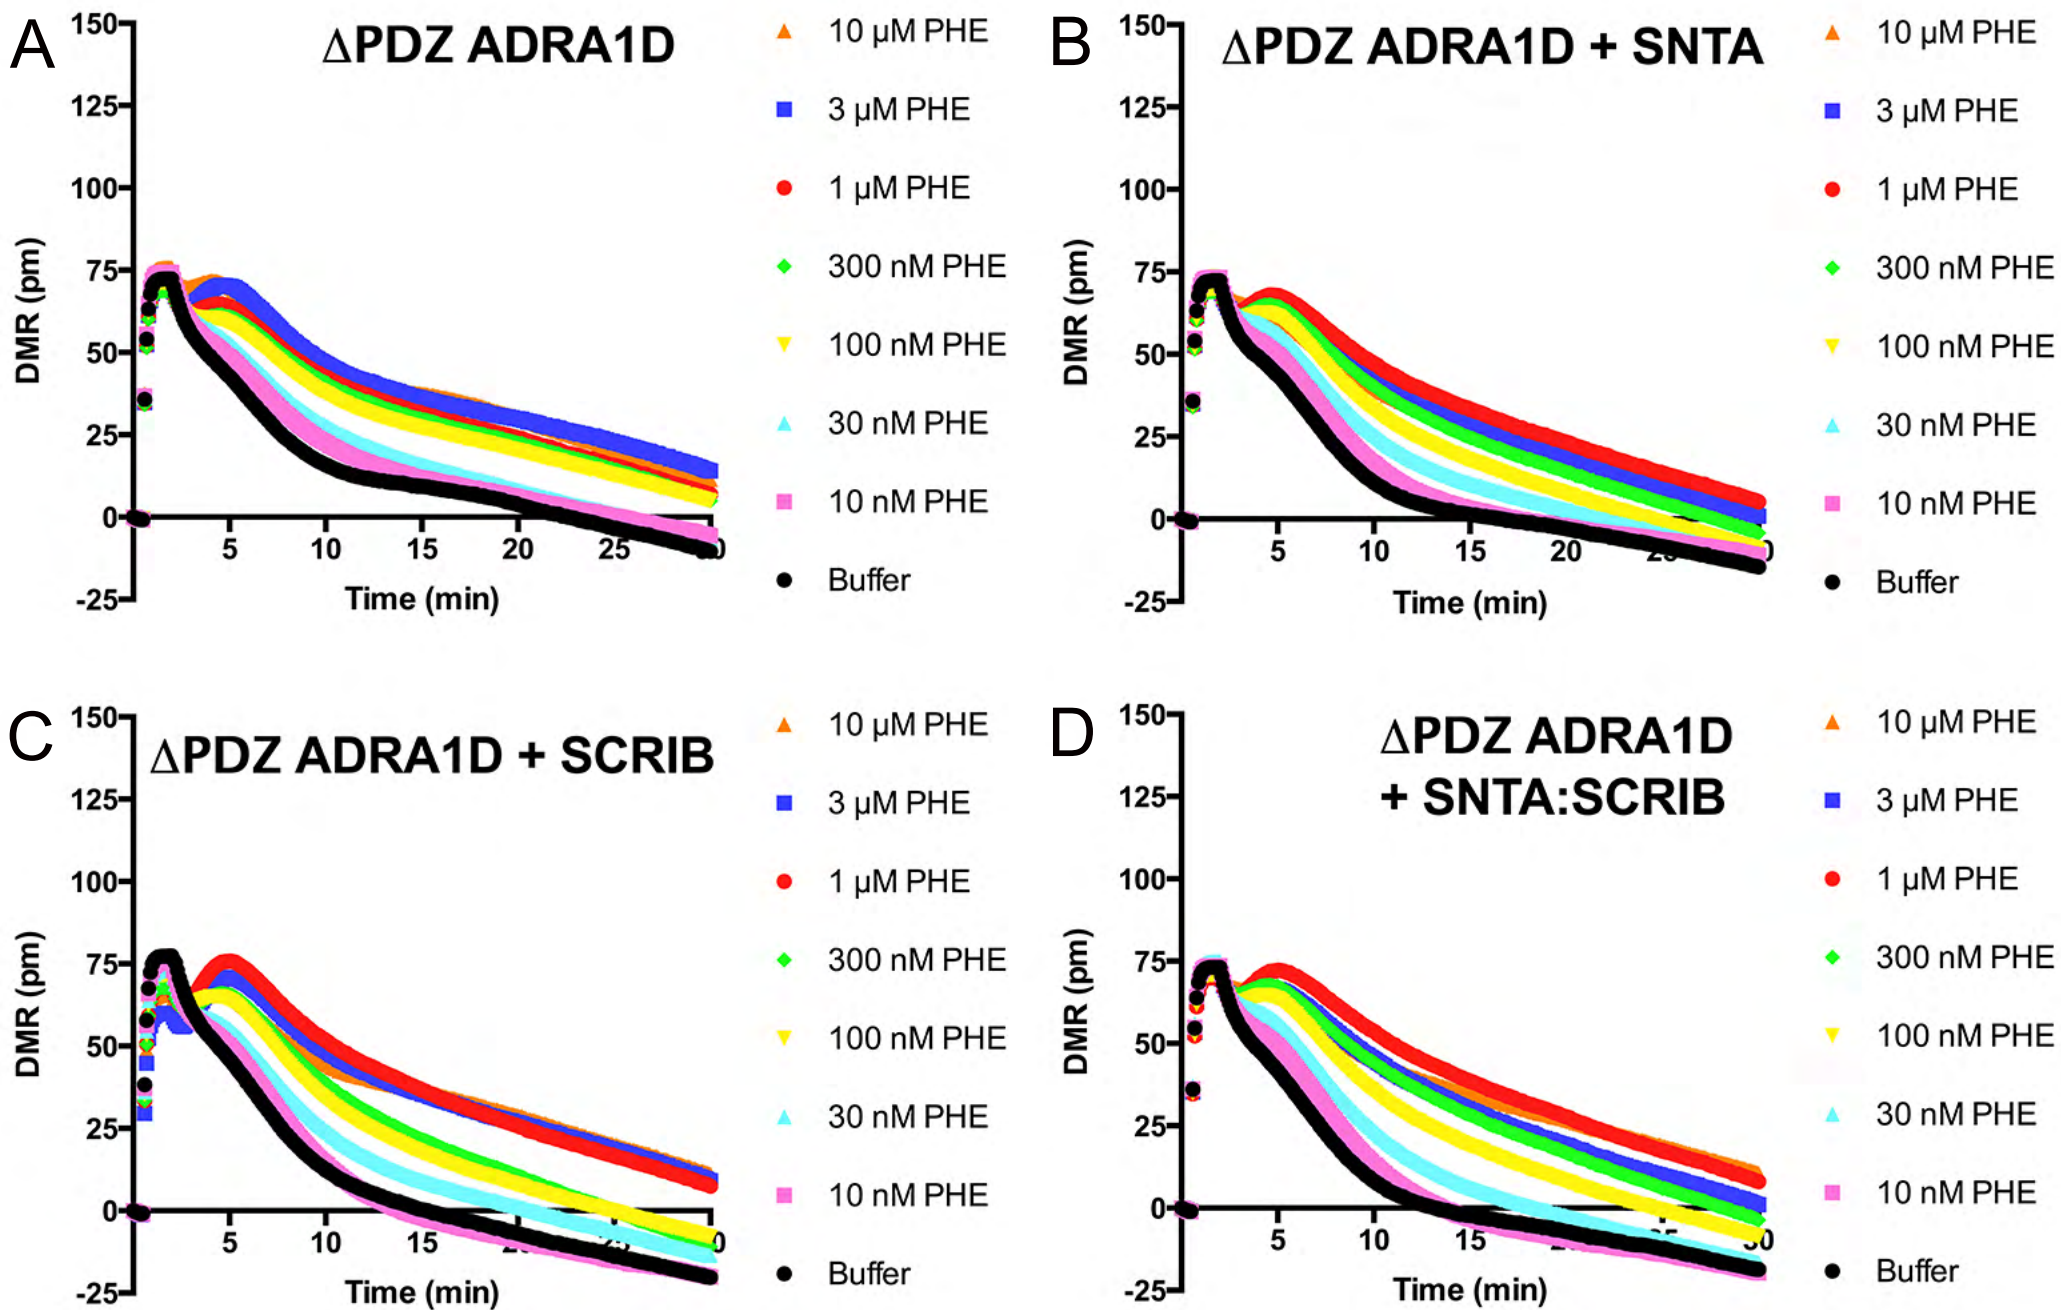

Supplement: celldisc201511-s4.pdf [file celldisc201511-s4.pdf]
